# Supplementary material for: Time-absorbance profile ratio background correction: introducing TAP to correct for spectral overlap in high-resolution continuum source graphite furnace atomic absorption spectrometry
Source: Royal Society of Chemistry journal article supplement (doi:10.1039/d1ja00233c), 2021-01-01
Supplement: d1ja00233c1.pdf [file d1ja00233c1.pdf]

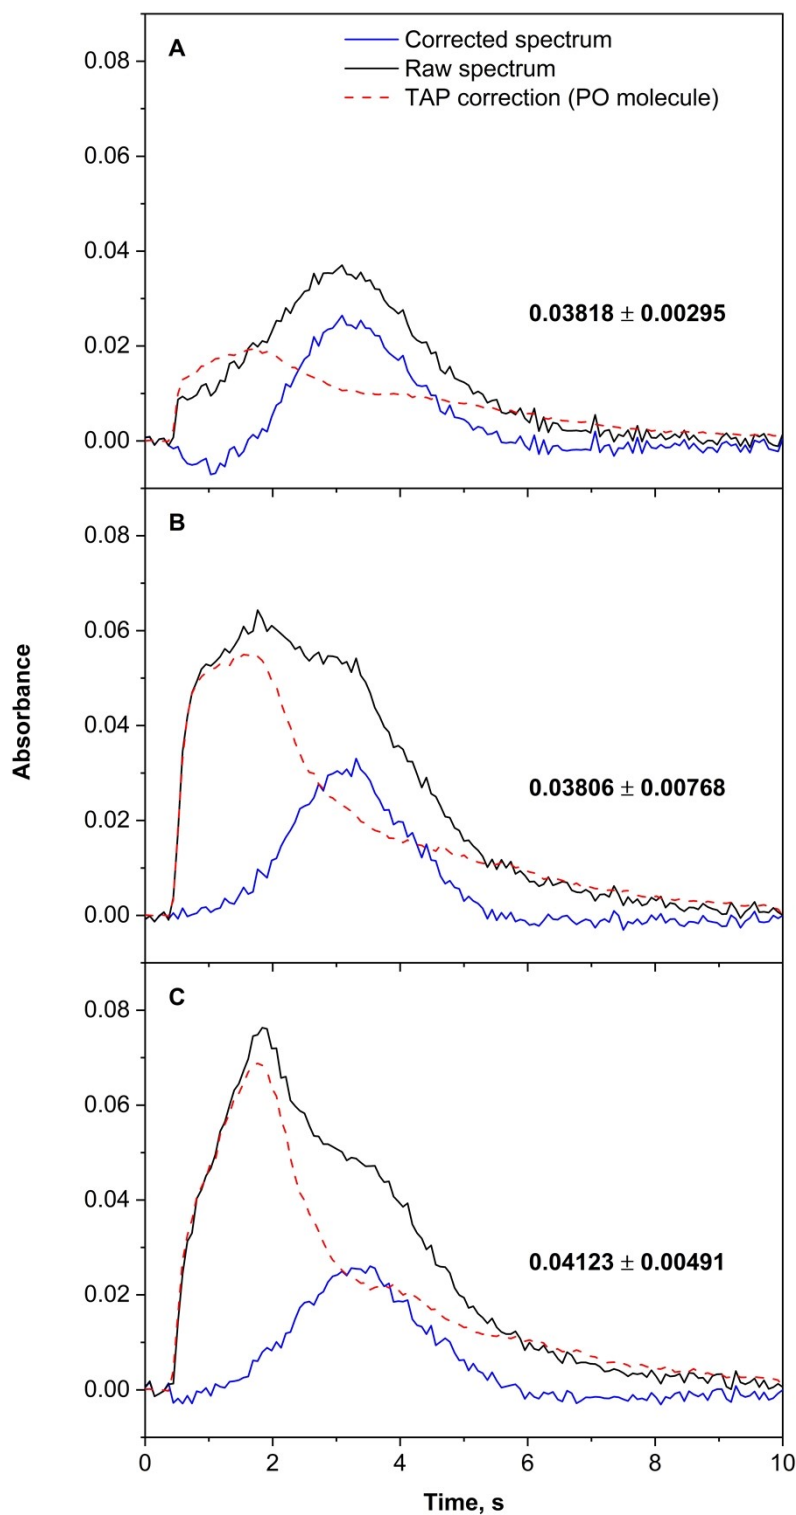

**Figure S1.** Time-resolved raw and corrected spectrum of 0.1 ng Pb at 217.000 nm (5 µg Pd+0.5 µg Mg) using TAP correction with P mass (as PO molecular interference) of (A) 10 µg, (B) 50 µg, and (C) 100 µg. The value is the mean integrated absorbance of three measurements, and the uncertainty is the standard deviation.
